# Supplementary material for: Racial and Ethnic Differences in 30-Day Hospital Readmissions Among US Adults With Diabetes
Source: PubMed Central journal article supplement (PMC6804020; doi:10.1001/jamanetworkopen.2019.13249), 2019-10-11
Supplement: jamanetwopen-2-e1913249-s001.pdf [file jamanetwopen-2-e1913249-s001.pdf]

## Supplementary Online Content

Rodriguez-Gutierrez R, Herrin J, Lipska KJ, Montori VM, Shah ND, McCoy RG. Racial and ethnic differences in 30-day hospital readmissions among US adults with diabetes. *JAMA Network Open*. 2019;2(10):e1913249. doi:10.1001/jamanetworkopen.2019.13249

**eTable.** Top Index Admission Diagnoses by Racial/Ethnic Group

This supplementary material has been provided by the authors to give readers additional information about their work.

**eTable. Top Index Admission Diagnoses by Racial/Ethnic Group**

| <b>White patients</b>                  | <b>N (%)</b> |
|----------------------------------------|--------------|
| Osteoarthritis                         | 18039 (5.5)  |
| Congestive heart failure               | 16926 (5.1)  |
| Septicemia (except in labor)           | 14456 (4.4)  |
| Diabetes mellitus with complications   | 13626 (4.1)  |
| Pneumonia                              | 13528 (4.1)  |
| Coronary atherosclerosis               | 12254 (3.7)  |
| Cardiac dysrhythmias                   | 12088 (3.7)  |
| Chronic obstructive pulmonary disease  | 11354 (3.4)  |
| Acute myocardial infarction            | 9932 (3.0)   |
| Skin and subcutaneous tissue infection | 9192 (2.8)   |
| <b>Black patients</b>                  |              |
| Congestive heart failure               | 6109 (6.8)   |
| Diabetes mellitus with complications   | 5236 (5.8)   |
| Septicemia (except in labor)           | 3544 (3.9)   |
| Acute and unspecified renal failure    | 3275 (3.6)   |
| Osteoarthritis                         | 3216 (3.6)   |
| Pneumonia                              | 3041 (3.4)   |
| Chronic obstructive pulmonary disease  | 2854 (3.2)   |
| Coronary atherosclerosis               | 2629 (2.9)   |
| Cardiac dysrhythmias                   | 2546 (2.8)   |
| Acute cerebrovascular disease          | 2354 (2.6)   |
| <b>Hispanic patients</b>               |              |
| Diabetes mellitus with complications   | 1952 (5.1)   |
| Congestive heart failure               | 1856 (4.9)   |
| Septicemia (except in labor)           | 1650 (4.3)   |
| Coronary atherosclerosis               | 1429 (3.7)   |
| Pneumonia                              | 1425 (3.7)   |
| Osteoarthritis                         | 1399 (3.7)   |
| Acute myocardial infarction            | 1091 (2.9)   |
| Urinary tract infections               | 1075 (2.8)   |
| Skin and subcutaneous tissue infection | 1059 (2.8)   |
| Nonspecific chest pain                 | 995 (2.6)    |
| <b>Asian patients</b>                  |              |
| Septicemia (except in labor)           | 655 (6.6)    |
| Coronary atherosclerosis               | 478 (4.8)    |
| Congestive heart failure               | 470 (4.7)    |
| Pneumonia                              | 366 (3.7)    |
| Diabetes mellitus with complications   | 358 (3.6)    |
| Osteoarthritis                         | 336 (3.4)    |
| Cardiac dysrhythmias                   | 305 (3.1)    |
| Acute myocardial infarction            | 299 (3.0)    |
| Acute cerebrovascular disease          | 275 (2.8)    |
| Acute and unspecified renal failure    | 263 (2.6)    |
